# Supplementary material for: The Gut Microbiome in the First One Thousand Days of Neurodevelopment: A Systematic Review from the Microbiome Perspective
Source: MDPI journal article supplement (doi:10.3390/microorganisms12030424), 2024-02-20
Supplement: s1 [file s1]

## Current knowledge

**Table S1.** Summary of epidemiological studies investigating the association between preterm infants' gut microbiome and neurodevelopment.

| Publication<br>Author(s) Year | Study design<br>(Year)<br>Setting | Population<br>(N)       | Microbiome                                             |                                             | Neurodevelopment<br>outcomes      |                                             | Covariates    | Key Findings                                                                                                                                                                                                                                                                                                                                                                                                                                                                                                                                                                                                                                                          |
|-------------------------------|-----------------------------------|-------------------------|--------------------------------------------------------|---------------------------------------------|-----------------------------------|---------------------------------------------|---------------|-----------------------------------------------------------------------------------------------------------------------------------------------------------------------------------------------------------------------------------------------------------------------------------------------------------------------------------------------------------------------------------------------------------------------------------------------------------------------------------------------------------------------------------------------------------------------------------------------------------------------------------------------------------------------|
|                               |                                   |                         | Method                                                 | Age                                         | Instruments                       | Age                                         |               |                                                                                                                                                                                                                                                                                                                                                                                                                                                                                                                                                                                                                                                                       |
| Beghetti et al. 2021          | Longitudinal (2014?) Italy        | Age < 32 weeks (N = 27) | 16S rRNA                                               | Feces at: 1, 4, 7, and 30 days              | (GMDS)                            | 24-month corrected age                      | Not described | <ul style="list-style-type: none"> <li>• Beta-diversity significantly different between infants with normal and neurodevelopmental impairment (NI) (<math>p \leq 0.05</math>).</li> <li>• NI: increased <i>Bifidobacteriaceae</i> at day 7 (<math>p = 0.05</math>).</li> <li>• <i>Bifidobacterium</i> (at day 30) directly correlated with 24-month GQ score (<math>p = 0.01</math>, <math>\tau = 0.449</math>). Major represented species were <i>B. longum</i> and <i>B. breve</i> (both not found in the gut microbiota with NI).</li> </ul>                                                                                                                       |
| Seki et al. 2021              | Longitudinal (2017-2019) Austria  | Age < 28 weeks (N = 60) | 16S rRNA (V4 region; qPCR (primer pair 515F and 806R). | Days: 3 and 7. Weeks: 2, 4, 6, 8, 10 and 12 | Cerebral oxygenation, Cranial MRI | Days: 3 and 7. Weeks: 2, 4, 6, 8, 10 and 12 | Not adjusted  | <ul style="list-style-type: none"> <li>• <i>Klebsiella</i> was more abundant at 4 weeks post-delivery in infants with severe brain injury (<math>p &lt; 0.01</math>).</li> <li>• <i>Bifidobacterium</i> sp. at 6 weeks and <i>Fingoldia</i> sp. were increased in infants with severe brain injury (<math>p &lt; 0.05</math>).</li> <li>• Increased <i>Enterococcus</i>, <i>Escherichia-Shigella</i>, and <i>Streptococcus</i> (<math>p = 0.008</math>, <math>0.028</math>, and <math>0.045</math>, respectively) 3 days post-delivery, and <i>Enterococcus</i> 2 weeks post-delivery (<math>p &lt; 0.01</math>) in infants without severe brain injuries.</li> </ul> |

|                      |                                 |                          |                         |                      |                                 |                                                 |                                                                                                                                                                              |                                                                                                                                                                                                                                                                                                                                                                                                                                                                                                                                                                                                                                                                                                                                                                                                                                                                                                 |
|----------------------|---------------------------------|--------------------------|-------------------------|----------------------|---------------------------------|-------------------------------------------------|------------------------------------------------------------------------------------------------------------------------------------------------------------------------------|-------------------------------------------------------------------------------------------------------------------------------------------------------------------------------------------------------------------------------------------------------------------------------------------------------------------------------------------------------------------------------------------------------------------------------------------------------------------------------------------------------------------------------------------------------------------------------------------------------------------------------------------------------------------------------------------------------------------------------------------------------------------------------------------------------------------------------------------------------------------------------------------------|
|                      |                                 |                          |                         |                      |                                 |                                                 |                                                                                                                                                                              | <ul style="list-style-type: none"> <li>● <i>Klebsiella pneumoniae</i> ASV_c07_vnh_xuf at 4 weeks was significantly associated with severe brain injury (<math>p &lt; 0.05</math>).</li> </ul>                                                                                                                                                                                                                                                                                                                                                                                                                                                                                                                                                                                                                                                                                                   |
| Oliphant et al. 2021 | Longitudinal (2010-2018) USA    | Age < 34 weeks (N = 58)  | 16S rRNA                | 27, 30, 33, 36 weeks | Head circumference growth (HCG) | From birth to 36 weeks Post-menstrual age (PMA) | Delivery mode, and patient (random effect)                                                                                                                                   | <ul style="list-style-type: none"> <li>● Beta-diversity was distinct between infants with appropriate HCG trajectories versus any suboptimal HCG trajectories (SHCGT) (<math>p = .001</math>). Higher <i>Bacteroidota</i> (<math>p = .01</math>) and <i>Lachnospiraceae</i> (<math>p &lt; .05</math>) were identified as potential biomarkers of AHCGT (adequate), a further reduction in <i>Actinobacteriota</i> (<math>-0.78</math>, <math>p &lt; .01</math>), leading to moderately to severely SHCGT.</li> <li>● Higher <i>Corynebacterium</i> (<math>1.76</math>, <math>p = .001</math>) and lower <i>Bacteroides</i> in SHCGT (<math>-1.78</math>, <math>p = .009</math>).</li> <li>● Lower <i>Faecalibacterium prausnitzii</i> (<math>p &lt; .05</math>), <i>Megasphaeraeaceae</i> (<math>p &lt; .05</math>) and <i>Negativicoccaceae</i> (<math>p &lt; .01</math>) in SHCGT.</li> </ul> |
| Rozé et al. 2020     | Longitudinal (2011-2018) France | Age < 31 weeks (N = 577) | 16S rRNA (V3–V4 region) | Week 4               | ASQ-3                           | 2 years                                         | Gestational age; Maternal age, country of birth, education, pre-pregnancy body mass index. Sex, birth weight, c-section, surfactant use, skin-to-skin contact, breastfeeding | <ul style="list-style-type: none"> <li>● Clusters with dominance of <i>Enterococcus</i> and <i>Staphylococcus</i> were significantly associated with 2-year non-optimal outcome (death or ASQ-3 score &lt;185) (<math>p = 0.03</math>).</li> </ul>                                                                                                                                                                                                                                                                                                                                                                                                                                                                                                                                                                                                                                              |

GMDS: Griffiths Mental Development Scale; MRI: Magnetic Resonance Imaging; ASQ-3: Ages and Stages Questionnaire.

**Table S2.** Summary of epidemiological studies investigating the association between term infants' gut microbiome and neurodevelopment.

| Publication<br>Author(s) Year | Study design<br>(Year)<br>Setting     | Population<br>(N)                              | Microbiome              |                                                                          | Neurodevelopment outcomes |                       | Covariates                                                                                                    | Key Findings                                                                                                                                                                                                                                                                                                                                                                                                                                                                                                                                                                                                                                                                                                                                                                                              |
|-------------------------------|---------------------------------------|------------------------------------------------|-------------------------|--------------------------------------------------------------------------|---------------------------|-----------------------|---------------------------------------------------------------------------------------------------------------|-----------------------------------------------------------------------------------------------------------------------------------------------------------------------------------------------------------------------------------------------------------------------------------------------------------------------------------------------------------------------------------------------------------------------------------------------------------------------------------------------------------------------------------------------------------------------------------------------------------------------------------------------------------------------------------------------------------------------------------------------------------------------------------------------------------|
|                               |                                       |                                                | Method                  | Age                                                                      | Instruments               | Age                   |                                                                                                               |                                                                                                                                                                                                                                                                                                                                                                                                                                                                                                                                                                                                                                                                                                                                                                                                           |
| Guzzardi <i>et al.</i> 2022   | Longitudinal<br>(2011–2014)<br>Italy  | All born at term (weeks not informed) (N = 90) | 16S rRNA (V3-V4 region) | Meconium (n = 79) and feces 3, 6, 12, and 36 months (n = 40, 47, 37, 21) | GMDS                      | 6–24 and 36–60 months | Delivery mode and sex                                                                                         | <ul style="list-style-type: none"> <li>• Meconium <i>Bifidobacterium</i> and <i>Veillonella</i> abundances were directly associated with practical reasoning scores at 60 months; p-value not informed.</li> <li>• At 60 months, GMDS total cognition score (<math>p &lt; 0.05</math>) was associated with bacterial composition in meconium, mainly determined by <i>Bifidobacterium</i> abundance.</li> <li>• Alpha and beta diversity findings were only descriptive.</li> </ul>                                                                                                                                                                                                                                                                                                                       |
| Tamana <i>et al.</i> 2021     | Longitudinal<br>(2009–2012)<br>Canada | Age >35 weeks (N = 405)                        | 16S rRNA (V4 region)    | 4 and 12 months                                                          | BSID                      | 1 year and 2 years    | Birth mode, sex, maternal ethnicity, older sibling, breastfeeding status at 6 months, family income, maternal | <ul style="list-style-type: none"> <li>• <i>Bacteroidetes</i>-dominant cluster was associated with higher scores for cognitive (<math>\beta = 4.8</math>), language (<math>\beta = 4.2</math>), and motor (<math>\beta = 3.1</math>) development at age 2. All <math>q &lt; 0.05</math>.</li> <li>• Boy infants with a <i>Bacteroidetes</i>-dominant microbiota (12 months) had more favorable cognitive (<math>\beta = 5.9</math>, <math>q = 0.06</math>) and language (<math>\beta = 7.9</math>, <math>q &lt; 0.001</math>) development at age 2.</li> <li>• Different species of <i>Bacteroides</i> including <i>B. fragilis</i>, <i>B. uniformis</i>, and unclassified <i>Bacteroides</i> were directly associated with cognitive and language development (all <math>q &lt; 0.05</math>).</li> </ul> |

|                            |                                      |                        |                                                       |                    |                                     |                    |                                     |                                                                                                                                                                                                                                                                                                                                                                                                                                                                                                                                                                                                                                                                                                                                                                                                                                                                                                                                                                                                                                                                                                                                                                                                                                                                                                         |
|----------------------------|--------------------------------------|------------------------|-------------------------------------------------------|--------------------|-------------------------------------|--------------------|-------------------------------------|---------------------------------------------------------------------------------------------------------------------------------------------------------------------------------------------------------------------------------------------------------------------------------------------------------------------------------------------------------------------------------------------------------------------------------------------------------------------------------------------------------------------------------------------------------------------------------------------------------------------------------------------------------------------------------------------------------------------------------------------------------------------------------------------------------------------------------------------------------------------------------------------------------------------------------------------------------------------------------------------------------------------------------------------------------------------------------------------------------------------------------------------------------------------------------------------------------------------------------------------------------------------------------------------------------|
|                            |                                      |                        |                                                       |                    |                                     |                    | overweight, and age at sampling.    | <ul style="list-style-type: none"> <li>Enhanced sphingolipid synthesis and metabolism, and competition between <i>Bacteroides</i> and <i>Streptococcus</i> were characteristic of a Bacteroidetes-dominant gut microbiota.</li> </ul>                                                                                                                                                                                                                                                                                                                                                                                                                                                                                                                                                                                                                                                                                                                                                                                                                                                                                                                                                                                                                                                                   |
| Carlson <i>et al.</i> 2021 | Longitudinal (Year not informed) USA | Age >37 weeks (N = 34) | 16S rRNA and Functional prediction (PICRUST pipeline) | 1 month and 1 year | Strange Situation; and Neuroimaging | 1 month and 1 year | Age at scan and sex                 | <ul style="list-style-type: none"> <li>1-month alpha-diversity inversely associated with 1-yo fear behavior score (<math>p &lt; 0.001</math>, <math>n = 19</math>).</li> <li>1-month Weighted Unifrac inversely associated with 1-year medial prefrontal cortex volume (<math>p &lt; 0.05</math>, <math>n = 14</math>).</li> <li>1-month <i>Streptococcus</i> inversely associated with 1-month amygdala (<math>q &lt; 0.05</math>), hippocampus (<math>q = 0.132</math>) and pre-frontal cortex volumes (<math>q = 0.123</math>).</li> <li>1-month <i>Bacteroides</i> directly associated with 1-month amygdala volume (<math>q = 0.074</math>).</li> <li>1-month <i>Lachnospiraceae</i> directly associated with 1-month PFC volume (<math>q = 0.123</math>).</li> <li>1-month <i>Veillonella</i> directly associated with 1-year PFC volume (<math>q = 0.052</math>).</li> <li>1-month <i>Enterobacteriaceae</i> inversely associated with 1-year PFC volume (<math>q = 0.052</math>).</li> <li>1-year <i>Dialister</i> directly associated with non-social fear behavior (Vocal Distress) (<math>q = 0.143</math>).</li> <li>1-year beta-diversity inversely associated with 1-year non-social fear behavior (<math>p &lt; 0.001</math>) and amygdala volume (<math>p &lt; 0.05</math>).</li> </ul> |
| Carlson <i>et al.</i> 2018 | Longitudinal (Year not informed)     | Age ~37 weeks (N = 89) | 16S rRNA (V1-V2 region)                               | 1 year             | MS, and structural MRI              | 1 and 2 years      | C-section, older siblings, paternal | <ul style="list-style-type: none"> <li>Mullen scores (receptive and expressive language) at age 2 differed between clusters with <i>Bacteroides</i> dominance showing the highest performance and <i>Faecalibacterium</i>-dominant cluster showing the</li> </ul>                                                                                                                                                                                                                                                                                                                                                                                                                                                                                                                                                                                                                                                                                                                                                                                                                                                                                                                                                                                                                                       |

|                        |                                              |                                 |                         |                                        |                                     |                                        |                                                                                                     |                                                                                                                                                                                                                                                                                                                                                                                                                                                                                                                                                                                                                                                |
|------------------------|----------------------------------------------|---------------------------------|-------------------------|----------------------------------------|-------------------------------------|----------------------------------------|-----------------------------------------------------------------------------------------------------|------------------------------------------------------------------------------------------------------------------------------------------------------------------------------------------------------------------------------------------------------------------------------------------------------------------------------------------------------------------------------------------------------------------------------------------------------------------------------------------------------------------------------------------------------------------------------------------------------------------------------------------------|
|                        | USA                                          |                                 |                         |                                        |                                     |                                        | ethnicity, breastfeeding, sex, maternal education, paternal age and ethnicity, twin status, income. | <p>lowest performance (<math>p &lt; 0.01</math>).</p> <ul style="list-style-type: none"> <li>• Higher alpha diversity associated with lower scores on the overall composite score, visual reception scale, and expressive language scale at age 2 (<math>p &lt; 0.05</math>).</li> <li>• Gut microbiome had minimal effects on brain volumes at 1 and 2 years of age.</li> </ul>                                                                                                                                                                                                                                                               |
| Gao <i>et al.</i> 2018 | Longitudinal (Year not informed) USA         | Age ~39 weeks (N = 39)          | 16S rRNA (V1-V2 region) | 1 year                                 | MS and Resting-state functional MRI | 1 and 2 years                          | Paternal ethnicity and age, older siblings, sex, maternal education, twin status, and income        | <ul style="list-style-type: none"> <li>• Alpha-diversity and left amygdala functional connectivity (Faith: <math>r = -0.55</math>, <math>p &lt; 0.001</math>; Shan: <math>r = -0.36</math>, <math>p &lt; 0.05</math>).</li> <li>• Connectivity between anterior cingulate cortex and right anterior insula associated with Chao1 (<math>r = -0.54</math>, <math>p &lt; 0.001</math>) and Shannon (<math>r = -0.42</math>, <math>p &lt; 0.01</math>).</li> <li>• Functional connectivity between supplemental motor area and left parietal cortex associated with alpha diversity (<math>r = 0.41</math>, <math>p &lt; 0.01</math>).</li> </ul> |
| Ou <i>et al.</i> 2022  | Longitudinal (Year not informed) Netherlands | Full-term (~40 weeks) (N = 193) | 16S rRNA (V4 region)    | 1, 3 and 4 months, and 6 and 10 years. | CBCL                                | 1, 3 and 4 months, and 6 and 10 years. | Child age, delivery mode, and breastfeeding.                                                        | <ul style="list-style-type: none"> <li>• Bacterial clusters (infancy and childhood) were not associated with behavior.</li> </ul>                                                                                                                                                                                                                                                                                                                                                                                                                                                                                                              |
| Acuña                  | Cross-                                       | Full-                           | 16S rRNA                | 18 months                              | BSID                                | 18                                     | Pregestation                                                                                        | <ul style="list-style-type: none"> <li>• Alpha diversity not statistically different.</li> </ul>                                                                                                                                                                                                                                                                                                                                                                                                                                                                                                                                               |

|                             |                                                  |                                                      |                      |                            |      |                                       |                                                                                                                                               |                                                                                                                                                                                                                                                                                                                                                                                                                                                                                                                                                                                                                                                                                                                                                                                                                                  |
|-----------------------------|--------------------------------------------------|------------------------------------------------------|----------------------|----------------------------|------|---------------------------------------|-----------------------------------------------------------------------------------------------------------------------------------------------|----------------------------------------------------------------------------------------------------------------------------------------------------------------------------------------------------------------------------------------------------------------------------------------------------------------------------------------------------------------------------------------------------------------------------------------------------------------------------------------------------------------------------------------------------------------------------------------------------------------------------------------------------------------------------------------------------------------------------------------------------------------------------------------------------------------------------------|
| <i>et al.</i><br>2021       | sectional<br>(2007-<br>2012)<br>Spain            | term<br>(Gestational age not informed)<br>(N = 71)   | (V1-V2 region)       |                            |      | months                                | al body mass index and breastfeeding until the third month                                                                                    | <ul style="list-style-type: none"> <li>• Fine motor (FM) skills explained 4% of beta-diversity variation (weighted unifrac) (<math>p &lt; 0.05</math>).</li> <li>• 2 enterotypes: <i>Firmicutes</i> dominant (Firm) and <i>Bacteroides</i> dominant (Bact) → above-median belonged to the Firm-enterotype, and below-median group belonged to the Bact-enterotype (<math>p &lt; 0.05</math>, odds ratio = 0.27);</li> <li>• Above-median FM: high prevalence of <i>Bifidobacterium</i>, <i>Collinsella</i>, <i>Coproccoccus</i>, <i>Enterococcus</i>, <i>Fusobacterium</i>, <i>Holdemanella</i>, <i>Lactobacillus</i>, <i>Propionibacterium</i>, <i>Roseburia</i>, <i>Veillonella</i>.</li> <li>• Below-median FM: enriched in <i>Parabacteroides</i> and <i>Turicibacter</i>.</li> </ul>                                        |
| Loughman <i>et al.</i> 2020 | Longitudinal<br>(Year not informed)<br>Australia | Age > 32 weeks (included pre- and term)<br>(N = 201) | 16S rRNA (V4 region) | 1, 6, and 12 months of age | CBCL | At 1, 6, and 12 months<br><br>2 years | Gestational age, mode of birth, antibiotic, breastfeeding at four weeks, siblings, household pet. Additional adjustment: Sex and child's age. | <ul style="list-style-type: none"> <li>• One- and six-months microbiome showed no association.</li> <li>• At 1 year: decreased <i>Prevotella</i> (logFC = -1.46, <math>q &lt; 0.001</math>) and increased <i>Lachnospiraceae</i> (logFC = 2.09, <math>q = 0.054</math>) in the case group; attenuated when adjusting for confounding (<math>q = 0.1</math>).</li> <li>• For <i>Lachnospiraceae</i>, <math>q</math>-values were 0.15, 0.01, and 0.01 respectively for 1-, 6-, and 12-month infant temperament.</li> <li>• <i>Prevotella</i> at 12 months and two-year behavior outcomes was primarily related to the Internalizing subscale.</li> <li>• Lower <i>Prevotella</i> and increased risk of being a case (Internalizing subscale) - adjusted (?). Antibiotics exposure was better predictor of this absence.</li> </ul> |

|                             |                                                                 |                                                         |                            |            |                                              |             |                                                                                                                                             |                                                                                                                                                                                                                                                                                                                                                                                                                                                                                                                                                                                                                                                                                                                                                                                                                                                                                                                            |
|-----------------------------|-----------------------------------------------------------------|---------------------------------------------------------|----------------------------|------------|----------------------------------------------|-------------|---------------------------------------------------------------------------------------------------------------------------------------------|----------------------------------------------------------------------------------------------------------------------------------------------------------------------------------------------------------------------------------------------------------------------------------------------------------------------------------------------------------------------------------------------------------------------------------------------------------------------------------------------------------------------------------------------------------------------------------------------------------------------------------------------------------------------------------------------------------------------------------------------------------------------------------------------------------------------------------------------------------------------------------------------------------------------------|
|                             |                                                                 |                                                         |                            |            |                                              |             |                                                                                                                                             | <ul style="list-style-type: none"> <li>• No assoc. between fecal SCFA and child behavior.</li> </ul>                                                                                                                                                                                                                                                                                                                                                                                                                                                                                                                                                                                                                                                                                                                                                                                                                       |
| Aatsink<br>i et al.<br>2022 | Nested<br>case-<br>control<br>(Year not<br>informed)<br>Finland | Included<br>pre- and<br>term<br>infants<br>(N =<br>131) | 16S rRNA<br>(V4<br>region) | 2.5 months | Eye<br>Tracking of<br>Emotional<br>Attention | 8<br>months | Gestational<br>age, delivery<br>mode,<br>breastfeedin<br>g, infant age<br>at sampling,<br>maternal<br>depressive<br>symptoms,<br>and<br>sex | <ul style="list-style-type: none"> <li>• Alpha and beta diversity not associated with fear or face bias.</li> <li>• Abundance of <i>Lactobacillus</i> (log2FC= -6.5), <i>Bifidobacterium</i> (log2FC= -5.3), <i>Prevotella</i> (log2FC= -5.7), and <i>Hemophilus</i> (log2FC= -6.8) were inversely and <i>Clostridium</i> (log2FC= 5.4) directly associated with fear bias. All FDR &lt; 0.001.</li> <li>• Fear bias did not show sex interaction with genera.</li> <li>• Random forest model showed <i>Bifidobacterium</i>, <i>Actinomyces</i>, <i>Clostridium</i>, <i>Collinsella</i>, and <i>Parabacteroides</i> as the most important features related to fear bias.</li> </ul>                                                                                                                                                                                                                                        |
| Aatsink<br>i et al.<br>2019 | Longitudi<br>nal<br>(2013-<br>2016)<br>Finland                  | Included<br>pre- and<br>term<br>(N =<br>301)            | 16S rRNA                   | 2.5 months | (IBQ-R                                       | 6<br>months | Sex, delivery<br>mode,<br>gestational<br>age, infant<br>age at<br>sampling,<br>antibiotic<br>use,<br>breastfeedin<br>g at 2.5<br>months     | <ul style="list-style-type: none"> <li>• Alpha-diversity associated with negative emotionality (<math>\beta</math>=-0.17, FDR = 0.17) and fear reactivity (<math>\beta</math>=-0.27, FDR = 0.17).</li> <li>• <i>Bacteroides</i>-cluster had highest and <i>V. dispar</i>-cluster lowest microbiota richness and diversity (FDR &lt; 10<sup>-8</sup>).</li> <li>• <i>Bifidobacterium</i>/<i>Enterobacteriaceae</i>-community had the highest and <i>Bacteroides</i>-cluster the lowest scores in temperament trait of regulation subscales were: high intensity pleasure, cuddliness and duration of orienting (all FDR = 0.20).</li> <li>• <i>Bacteroides</i>-cluster was inversely associated with the main dimension of regulation (<math>\beta</math>=-0.18, FDR = 0.17).</li> <li>• <i>V. dispar</i>-cluster was inversely associated with regulation (<math>\beta</math>=-0.22, FDR = 0.09) and cuddliness</li> </ul> |

|                               |                                   |                                                                    |                         |                  |       |           |                                                                                    |                                                                                                                                                                                                                                                                                                                                                                                                                                                                                                                                                                                                                                                  |
|-------------------------------|-----------------------------------|--------------------------------------------------------------------|-------------------------|------------------|-------|-----------|------------------------------------------------------------------------------------|--------------------------------------------------------------------------------------------------------------------------------------------------------------------------------------------------------------------------------------------------------------------------------------------------------------------------------------------------------------------------------------------------------------------------------------------------------------------------------------------------------------------------------------------------------------------------------------------------------------------------------------------------|
|                               |                                   |                                                                    |                         |                  |       |           |                                                                                    | <p>(<math>\beta = -0.29</math>, FDR &lt; 0.01).</p> <ul style="list-style-type: none"> <li>• Surgency was inversely associated with <i>Atopobium</i> and directly associated with <i>Bifidobacterium</i> and <i>Streptococcus</i> (FDR &gt; 0.2).</li> <li>• <i>Erwinia</i> was directly associated with Regulation and Negative emotionality. <i>Rothia</i> and <i>Serratia</i> were directly associated with Negative emotionality and Fear reactivity. <i>Peptoniphilus</i> and <i>Atopobium</i> were directly associated with Fear reactivity.</li> </ul>                                                                                    |
| Rothenberg <i>et al.</i> 2021 | Cross-sectional (2013-2014) China | Age $\geq$ 37 weeks (N = 46)                                       | 16S rRNA (V3–V4 region) | 36 months        | BSID  | 36 months | Child's sex, age at BSID-II assessment, breastfeeding, maternal age and education. | <ul style="list-style-type: none"> <li>• 3 coabundance factors were found for the 25 most abundant taxa.</li> <li>• Alpha diversity measures were not associated with Bayley scores in adjusted regression models (<math>p &gt; 0.16</math>).</li> <li>• The first Coabundance factor (positive loadings for <i>Faecalibacterium</i>, <i>Sutterella</i>, and <i>Clostridium</i> cluster XIVa) was directly associated with Mental Developmental Index (<math>\beta = 3.9</math> points, <math>p &lt; 0.05</math>) and Psychomotor Developmental Index (<math>\beta = 8.6</math> points, <math>p &lt; 0.01</math>) in adjusted models.</li> </ul> |
| Zhang <i>et al.</i> 2021      | Case-control (2019-2020) China    | Age $\geq$ 37 weeks (N = 45 [study group] and 32 [control group]). | 16S rRNA (V3 region)    | Days 1, 3, and 5 | ASQ-3 | 6 months  | Not adjusted                                                                       | <ul style="list-style-type: none"> <li>• Higher alpha diversity at day one in case infants (diagnosed with asphyxia) than in the control group (<math>p &lt; 0.05</math>). No significant difference at day 3 and 5.</li> <li>• The dominant microorganisms in the case group on day 1 were <i>Lachnospiraceae</i> and <i>Clostridia</i> on day 1, and only <i>Clostridia</i> on day 3. In the control group, <i>Staphylococcus</i> dominated on day 3.</li> </ul>                                                                                                                                                                               |



|                          |                                            |                                          |                         |                                |              |           |                                 |                                                                                                                                                                                                                                                                                                                                                                                                                                                                                                                                                                                                                                                                                                                                                                                                                                                                                                                                                                                    |
|--------------------------|--------------------------------------------|------------------------------------------|-------------------------|--------------------------------|--------------|-----------|---------------------------------|------------------------------------------------------------------------------------------------------------------------------------------------------------------------------------------------------------------------------------------------------------------------------------------------------------------------------------------------------------------------------------------------------------------------------------------------------------------------------------------------------------------------------------------------------------------------------------------------------------------------------------------------------------------------------------------------------------------------------------------------------------------------------------------------------------------------------------------------------------------------------------------------------------------------------------------------------------------------------------|
|                          |                                            |                                          |                         |                                |              |           |                                 | <ul style="list-style-type: none"> <li>• The communication score of ASQ-3 (6 months) in the case group was inversely correlated with <i>Lachnospiraceae</i> (<math>-0.366</math>; <math>p &lt; 0.05</math>) and <i>Clostridia</i> (<math>-0.030</math>; <math>p &lt; 0.05</math>) on day 1.</li> </ul>                                                                                                                                                                                                                                                                                                                                                                                                                                                                                                                                                                                                                                                                             |
| Fox <i>et al.</i> 2021   | Longitudinal<br>(Year not informed)<br>USA | Gestational age not informed<br>(N = 67) | 16S rRNA (V3–V4 region) | 1–3 weeks, 2, 6, and 12 months | IBQ-R        | 12 months | Sex and Breastfeeding           | <ul style="list-style-type: none"> <li>• Beta diversity at age 1–3 weeks was associated with surgency/extraversion (<math>R^2 = 0.276</math>, <math>p &lt; .01</math>), subscales included approach (<math>R^2 = 0.285</math>, <math>p &lt; .01</math>), high-intensity pleasure (<math>R^2 = 0.275</math>, <math>p &lt; .01</math>), and smiling/laughter (<math>R^2 = 0.273</math>, <math>p &lt; .01</math>).</li> <li>• <i>Bifidobacterium</i> and <i>Lachnospiraceae</i> abundance at 1–3 weeks of age was directly associated with surgency/extraversion at age 12 months (<math>q &lt; 0.01</math>).</li> <li>• <i>Klebsiella</i> abundance at 1–3 weeks was inversely associated with surgency/extraversion at 12 months (<math>q &lt; 0.01</math>).</li> <li>• 12-month-old microbiota was associated with negative affectivity at 12 months, specifically <i>Ruminococcus</i> and an inverse association with <i>Lactobacillus</i> (<math>q &lt; 0.01</math>).</li> </ul> |
| Zhang <i>et al.</i> 2021 | Cross-sectional<br>2014<br>China           | Age $\pm$ 39.6 weeks<br>(N = 38)         | 16S rRNA (V4–V5 region) | 3 years                        | GDI and CBCL | 3 years   | Sex and Hydroxyl PAHs (OH-PAHs) | <ul style="list-style-type: none"> <li>• <b>GDI:</b> The phyla <i>Firmicutes</i>, <i>Actinobacteria</i>, <i>Proteobacteria</i>, <i>Tenericutes</i>, and <i>Lentisphaerae</i> were directly correlated with most domain behavior scores of the GDI.</li> <li>• <i>Firmicutes</i> showed a significant correlation with Gross motor behavior score (<math>r = 0.327</math>, <math>p &lt; 0.05</math>).</li> <li>• <i>Bacteroidetes</i>, showed an inverse correlation with the Gross motor score (<math>r = -0.416</math>, <math>p &lt; 0.01</math>) and <i>Fusobacteria</i> with the Adaptive score (<math>r = -0.334</math>, <math>p &lt; 0.05</math>); and an inverse association with OH-PAH</li> </ul>                                                                                                                                                                                                                                                                          |

|                           |                                         |                            |                                |         |                    |         |                                                                                                                                                                                                                                      |                                                                                                                                                                                                                                                                                                                                                                                                                                                                                                                                                                                                                                                                                                                                                                                                                                                                                                                                                                                                                                                                                                                                                                                                                                                                                                   |
|---------------------------|-----------------------------------------|----------------------------|--------------------------------|---------|--------------------|---------|--------------------------------------------------------------------------------------------------------------------------------------------------------------------------------------------------------------------------------------|---------------------------------------------------------------------------------------------------------------------------------------------------------------------------------------------------------------------------------------------------------------------------------------------------------------------------------------------------------------------------------------------------------------------------------------------------------------------------------------------------------------------------------------------------------------------------------------------------------------------------------------------------------------------------------------------------------------------------------------------------------------------------------------------------------------------------------------------------------------------------------------------------------------------------------------------------------------------------------------------------------------------------------------------------------------------------------------------------------------------------------------------------------------------------------------------------------------------------------------------------------------------------------------------------|
|                           |                                         |                            |                                |         |                    |         |                                                                                                                                                                                                                                      | <p>levels.</p> <ul style="list-style-type: none"> <li>● <b>CBCL:</b> The phyla <i>Bacteroidetes</i>, <i>Actinobacteria</i>, and <i>Fusobacteria</i> showed direct correlations with most CBCL core and broadband syndromes. While <i>Firmicutes</i>, <i>Verrucomicrobia</i>, <i>Synergistetes</i>, <i>Proteobacteria</i> and <i>Tenericutes</i> were inversely correlated.</li> </ul>                                                                                                                                                                                                                                                                                                                                                                                                                                                                                                                                                                                                                                                                                                                                                                                                                                                                                                             |
| Kelsey <i>et al.</i> 2021 | Cross-sectional (Year not informed) USA | Age ± 39.43 weeks (N = 63) | Shotgun metagenomic sequencing | 25 days | rs-fNIRS and IBQ-R | 25 days | <p><u>For Shannon:</u> BW, income, breastfeeding, gestational age, head circumference.</p> <p><u>For functional term diversity:</u> income, gestational age, antibiotics, sex, head circumference.</p> <p><u>For psychologic</u></p> | <ul style="list-style-type: none"> <li>● Direct association between taxa diversity and the left fronto-parietal network (FDR &lt; 0.07) and, alpha diversity and homologous-interhemispheric network connectivity (Chao1-taxa <math>\beta</math> = 0.16, FDR = 0.10, R2 = 0.07; Shannon-Taxa <math>\beta</math> = 0.06, FDR = 0.20, R2 = 0.09).</li> <li>● Increased microbial genes encoding for virulence factors linked to increased homologous-interhemispheric connectivity.</li> <li>● <b>Functional connectivity: 1) Left default mode network:</b> <u>Group w/ high connectivity:</u> increased <i>C. perfringens</i>; <b>2) Left fronto-parietal network:</b> <u>Group w/ high connectivity:</u> increased <i>Enterococcus faecalis</i>, <i>Collinsella</i>, <i>C. disporicum</i>, <i>Prevotella copri</i>, <i>C. perfringens</i>, <i>C. tertium</i>, <i>Robinsoniella peoriensis</i>, <i>C. Unclass</i>, <i>Bacteroides caccae</i>, <i>E. coli</i>; <u>decreased:</u> <i>S. salivarius</i>, <i>Enterococcus Unclass</i>. <b>3) Homologous-interhemispheric network:</b> <u>Group w/ high connectivity:</u> increased <i>E. coli</i> and decreased <i>B. dentium</i>.</li> <li>● <b>Temperament: High negative emotionality and regulation/orienting:</b> increased <i>B.</i></li> </ul> |

|                              |                                                    |                               |                                                           |                                                                                          |        |                |                                                                                                                                                                                               |                                                                                                                                                                                                                                                                                                                                                                                                                                                                                                                                                                                                                                                                                                                                                                                                                                                                                                                                                                                                                                                                                                                                               |
|------------------------------|----------------------------------------------------|-------------------------------|-----------------------------------------------------------|------------------------------------------------------------------------------------------|--------|----------------|-----------------------------------------------------------------------------------------------------------------------------------------------------------------------------------------------|-----------------------------------------------------------------------------------------------------------------------------------------------------------------------------------------------------------------------------------------------------------------------------------------------------------------------------------------------------------------------------------------------------------------------------------------------------------------------------------------------------------------------------------------------------------------------------------------------------------------------------------------------------------------------------------------------------------------------------------------------------------------------------------------------------------------------------------------------------------------------------------------------------------------------------------------------------------------------------------------------------------------------------------------------------------------------------------------------------------------------------------------------|
|                              |                                                    |                               |                                                           |                                                                                          |        |                | al outcomes:<br>infant age<br>and income.                                                                                                                                                     | <i>pseudocatenulatum</i> .                                                                                                                                                                                                                                                                                                                                                                                                                                                                                                                                                                                                                                                                                                                                                                                                                                                                                                                                                                                                                                                                                                                    |
| Eckermann <i>et al.</i> 2022 | Longitudinal<br>(Year not informed)<br>Netherlands | Age ≥37 weeks<br>(N = 156)    | 16S rRNA (V4 region)                                      | At month 1, 3 and 4 as well as at 6 and 10 years.                                        | BRIEF  | 8 and 10 years | Breastfeeding, maternal education, child sex and age.                                                                                                                                         | <ul style="list-style-type: none"> <li>Any association between fecal microbiota composition and executive function was found (using Random Forest regression, Bayesian linear models and Partitioning around Medoids).</li> <li>Evaluated only alpha diversity.</li> </ul>                                                                                                                                                                                                                                                                                                                                                                                                                                                                                                                                                                                                                                                                                                                                                                                                                                                                    |
| Laue <i>et al.</i> 2021      | Longitudinal<br>(Year not informed)<br>USA         | Age ± 39.5 weeks<br>(N = 260) | 16S rRNA (V4-V5 region)<br>Shotgun metagenomic sequencing | 16S rRNA (6 weeks, 1, and 2 years)<br>N = 523<br>Shotgun (6 weeks and 1 year)<br>N = 234 | BASC-2 | 3 years        | Child sex, gestational age, maternal education, parity, delivery mode, maternal and paternal age at delivery, maternal smoking during pregnancy, early life exclusive breastfeeding, duration | <ul style="list-style-type: none"> <li>At 6 weeks, alpha diversity was associated with better Anxiety scale (<math>p &lt; 0.05</math>) among boys.</li> <li>At 2 years, alpha diversity was associated with better Social Skills and Adaptive Skills among boys and better Developmental Social Disorders among girls. All <math>p &lt; 0.01</math>.</li> <li>No association between beta diversity and BASC-2 scores.</li> <li><b>Using 16S:</b> At 6 weeks: <i>Bifidobacterium</i>, <i>Bacteroides vulgatus</i>, and a <i>Streptococcus</i> were related to better Adaptive Skills scores among boys (FDR &lt; 0.1); <i>Klebsiella</i>, <i>Clostridium</i>, and <i>Haemophilus</i> were related to worse Adaptive Skills among boys (FDR &lt; 0.1); and <i>Tyzzzerella nexilis</i> was associated with better Depression scores among boys (<math>q = 0.07</math>).</li> <li>At 1 year, <i>Faecalitalea</i> was associated with worse Hyperactivity scores, no discernable sex-specific effects (<math>q = 0.05</math>).</li> <li>At 2 years, <i>Blautia</i> was associated with worse measures of hyperactivity (FDR &lt; 0.1).</li> </ul> |

|                             |                             |                                                            |                                                             |                           |       |                 |                                                                                    |                                                                                                                                                                                                                                                                                                                                                                                                                                                                                                                                                                                                                                                                                             |
|-----------------------------|-----------------------------|------------------------------------------------------------|-------------------------------------------------------------|---------------------------|-------|-----------------|------------------------------------------------------------------------------------|---------------------------------------------------------------------------------------------------------------------------------------------------------------------------------------------------------------------------------------------------------------------------------------------------------------------------------------------------------------------------------------------------------------------------------------------------------------------------------------------------------------------------------------------------------------------------------------------------------------------------------------------------------------------------------------------|
|                             |                             |                                                            |                                                             |                           |       |                 | of any breastfeeding, and child age at follow-up                                   | <ul style="list-style-type: none"> <li>● <b>Using Metagenomic sequencing:</b> At 6 weeks, <i>Klebsiella oxytoca</i> was inversely associated with Adaptive Skills (<math>q = 0.02</math>) and Developmental Social Disorders (<math>q = 0.1</math>) scores among boys and <i>Granulicatella</i> was associated with worse Anxiety scores among girls (<math>q = 0.05</math>).</li> <li>● At 1 year, <i>Streptococcus peroris</i> was associated with lower Depression and Internalizing Problems among girls (<math>q &lt; 0.01</math>).</li> <li>● Several pathways were associated with better Depression scores among boys related to vitamin B6 biosynthesis or NAD salvage.</li> </ul> |
| Wu <i>et al.</i> 2021       | RCT 2017 China              | Age: 7-14 days (66 breast-fed and 133 formula-fed infants) | Analysis of Bifidobacteria (16S high-throughput sequencing) | Baseline, weeks 16 and 24 | ASQ-3 | Weeks 16 and 24 | Maternal education level                                                           | <p>Chance to scoring close to the threshold of delay:</p> <ul style="list-style-type: none"> <li>● 1 domain OR: 0.947 (CI: 0.901–0.996) <math>p &lt; 0.05</math> (protective for the risk of developmental delay).</li> <li>● <math>\geq 2</math> domains 1.001 (0.964–1.039) <math>p = 0.962</math> (not associated).</li> </ul>                                                                                                                                                                                                                                                                                                                                                           |
| Sordillo <i>et al.</i> 2019 | RCT (Year not informed) USA | Full term (gestational age $\pm 39.1$ weeks) (N = 309)     | 16S rRNA (V3/V5 regions)                                    | 3 to 6 months             | ASQ-3 | 3 years         | Gestational age, ethnicity, sex, antibiotic, breastfeeding, c-section, age at ASQ- | <ul style="list-style-type: none"> <li>● Coabundance scores dominated by <i>Clostridiales</i> were associated with poorer ASQ-3 communication (<math>\beta</math>, <math>-1.12</math>; <math>p = .05</math>) and personal and social (<math>\beta</math>, <math>-1.44</math>; <math>p = .01</math>) scores.</li> <li>● The <i>Bacteroides</i>-dominated coabundance grouping was associated with poorer fine motor scores (<math>\beta</math>, <math>-2.42</math>; <math>p = .01</math>).</li> </ul>                                                                                                                                                                                        |

|  |  |  |  |  |  |  |                                                                          |  |
|--|--|--|--|--|--|--|--------------------------------------------------------------------------|--|
|  |  |  |  |  |  |  | 3, maternal education and age, marital status, income, and clinical site |  |
|--|--|--|--|--|--|--|--------------------------------------------------------------------------|--|

GMDS-R: Griffiths Mental Development Scale; MRI: Magnetic Resonance Imaging; ASQ-3: Ages and Stages Questionnaire; BSID: Bayley Scale of Infant Development; MS: Mullen Scales; CBCL: Child Behavior Checklist; IBQ-R: Maternal reports of Infant Behavior Questionnaire -Revised; GDI: Gesell Development Inventory; rs-fNIRS: Resting state functional near infrared spectroscopy; BRIEF: Behavior Rating Inventory of Executive Function.
